# Supplementary material
Source: Research Square preprint supplement (doi:10.21203/rs.3.rs-9009151/v1)
Supplement: Supplementary file 1 [file 49ad25556c789cdad2b99f86.docx]

**Table 1.** Descriptive characterisrics of the groups

| **Group** | **Age** | **Weight (kg) ± sd** | **Height (cm) ± sd** |
| --- | --- | --- | --- |
| **SSG** | 17.0 | 65.8 ± 6.39 | 176.0 ± 4.97 |
| **SSG + HIIT** | 16.0 | 64.4 ± 5.23 | 174.3 ± 4.44 |
| **Total** | 16.5 | 65.1 ± 5.89 | 175.2 ± 4.87 |
| SSG = Small Sided Game; HIIT = High-Intensity Interval Training | | | |

**Table 2.** Training program of the experiment groups

|  | SSG + HIIT | SSG |
| --- | --- | --- |
| Day 1 | 30 -15 IFT | 30 -15 IFT |
| Day 2 | Technical and Tactical Training | Technical and Tactical Training |
| Day 3 | SSG: 9v9, 80x48m, 2x10’ game, 2’ rest  HIIT: 3x2‘, VIFT 85%, 2’ rest | SSG: 9v9, 80x48m, 2x13’ game, 2’ rest |
| Day 4 | Regeneration | Regeneration |
| Day 5 | Technical and Tactical Training | Technical and Tactical Training |
| Day 6 | SSG: 9v9, 80x48m, 2x11’ game, 2’ rest  HIIT: 3x2‘, VIFT 90%, 2’ rest | SSG: 9v9, 80x48m, 2x14’ game, 2’ rest |
| Day 7 | Regeneration | Regeneration |
| Day 8 | Technical and Tactical Training | Technical and Tactical Training |
| Day 9 | Friendly match | Friendly match |
| Day 10 | Technical and Tactical Training | Technical and Tactical Training |
| Day 11 | SSG: 7v7, 60x36m, 4x4' game, 2’ rest  HIIT: 3x2’ , VIFT 95%, 2’ rest | SSG: 7v7, 60x36m, 2x14'game, 2’ rest |
| Day 12 | Rest | Rest |
| Day 13 | Tactical Training | Tactical Training |
| Day 14 | Technical and Tactical Training | Technical and Tactical Training |
| Day 15 | Friendly match | Friendly match |
| Day 16 | Rest | Rest |
| Day 17 | Technical and Tactical Training | Technical and Tactical Training |
| Day 18 | Technical and Tactical Training | Technical and Tactical Training |
| Day 19 | SSG: 5v5, 40x24m, 4x4' game, 2’ rest  HIIT: 15”- 15” 6x2’ VIFT 100%, 2’ rest | SSG: 5v5, 40x24m, 5x4' game, 2’ rest |
| Day 20 | Rest | Rest |
| Day 21 | Regeneration | Regeneration |
| Day 22 | Technical and Tactical Training | Technical and Tactical Training |
| Day 23 | Friendly match | Friendly match |
| Day 24 | Technical and Tactical Training | Technical and Tactical Training |
| Day 25 | Rest | Rest |
| Day 26 | Rest | Rest |
| Day 27 | Technical and Tactical Training | Technical and Tactical Training |
| Day 28 | SSG: 5v5, 40x24m, 4x4' game, 2’ rest  HIIT: 15”- 15” 6x2’ VIFT 105%, 2’ rest | SSG: 5v5, 40x24m, 6x4' game, 2’ rest |
| Day 29 | Technical and Tactical Training | Technical and Tactical Training |
| Day 30 | Technical and Tactical Training | Technical and Tactical Training |
| Day 31 | Tactical Training | Tactical Training |
| Day 32 | Rest | Rest |
| Day 33 | League match | League match |
| Day 34 | Rest | Rest |
| Day 35 | SSG: 3v3, 20x12m, 6x1' game, 2,5’ rest  HIIT: 15”- 15” 6x2’ VIFT 110%, 2’ rest | SSG: 3v3, 20x12m, 6x1,5' game, 3’ rest |
| Day 36 | Regeneration | Regeneration |
| Day 37 | Tactical | Tactical Training |
| Day 38 | SSG: 3v3, 20x12m, 6x1' game, 2,5’ rest  HIIT: 15’’- 15’’ 6x2 VIFT 110%, 2’ rest | SSG: 3v3, 20x12m, 6x1,5' game, 3’ rest |
| Day 39 | Regeneration | Regeneration |
| Day 40 | 30 -15 IFT | 30 -15 IFT |
| TOTAL VOLUME | **106’ SSG + 30’ HIIT** | **136’ SSG** |
